# Supplementary material for: Association of circulating metabolites with healthy diet and risk of cardiovascular disease: analysis of two cohort studies
Source: PubMed Central journal article supplement (PMC5988716; doi:10.1038/s41598-018-26441-1), 2018-06-05
Supplement: 41598_2018_26441_MOESM1_ESM.pdf [file 41598_2018_26441_MOESM1_ESM.pdf]

Manuscript Title : Association of circulating metabolites with healthy diet and risk of cardiovascular disease: analysis of two cohort studies

Authors : Tasnime N. Akbaraly, Peter Würtz, Archana Singh-Manoux, Martin J. Shipley, Rita Haapakoski, Maili Lehto, Catherine Desrumaux, Mika Kähönen, Terho Lehtimäki, Vera Mikkilä, Aroon Hingorani, Steve E. Humphries, Antti J. Kangas, Pasi Soininen, Olli Raitakari, Mika Ala-Korpela, Mika Kivimäki

### Online Supplementary Material

Supplementary Table A: Metabolite concentrations in Whitehall II participants

|                                            | <b>N</b> | <b>Mean</b> | <b>sd</b> |
|--------------------------------------------|----------|-------------|-----------|
| <b>Amino Acids</b>                         |          |             |           |
| Alanine (mmol/L)                           | 4797     | 0.42        | 0.06      |
| Glutamine (mmol/L)                         | 4784     | 0.60        | 0.07      |
| Glycine (mmol/L)                           | 4787     | 0.30        | 0.05      |
| Histidine (mmol/L)                         | 4734     | 0.08        | 0.01      |
| Isoleucine (mmol/L)                        | 4821     | 0.06        | 0.01      |
| Leucine (mmol/L)                           | 4819     | 0.09        | 0.02      |
| Valine (mmol/L)                            | 4809     | 0.19        | 0.03      |
| Phenylalanine (mmol/L)                     | 4800     | 0.08        | 0.01      |
| Tyrosine (mmol/L)                          | 4776     | 0.06        | 0.01      |
| <b>Glycolysis related metabolites</b>      |          |             |           |
| Glucose (mmol/L)                           | 4745     | 5.17        | 1.17      |
| Lactate (mmol/L)                           | 4816     | 1.91        | 0.55      |
| Pyruvate (mmol/L)                          | 4815     | 0.09        | 0.03      |
| Citrate (mmol/L)                           | 4798     | 0.13        | 0.02      |
| Glycerol (mmol/L)                          | 4767     | 0.10        | 0.04      |
| <b>Ketone bodies</b>                       |          |             |           |
| Acetate (mmol/L)                           | 4818     | 0.07        | 0.03      |
| Acetoacetate (mmol/L)                      | 4820     | 0.06        | 0.04      |
| 3-hydroxybutyrate (mmol/L)                 | 4806     | 0.16        | 0.11      |
| <b>Fluid balance</b>                       |          |             |           |
| Creatinine (mmol/L)                        | 4758     | 0.08        | 0.01      |
| Albumin (standardized concentration units) | 4817     | 0.10        | 0.01      |

|                                                                |      |       |       |
|----------------------------------------------------------------|------|-------|-------|
| <b>Inflammation</b>                                            |      |       |       |
| Glycoprotein acetyls, mainly a1-acid glycoprotein (mmol/L)     | 4821 | 1.44  | 0.22  |
| VLDL particles (nm)                                            | 4824 | 35.9  | 1.0   |
| LDL particles (nm)                                             | 4824 | 23.6  | 0.1   |
| HDL particles (nm)                                             | 4824 | 9.9   | 0.2   |
| Total lipids in chylomicrons and extremely large VLDL (mmol/L) | 4805 | 0.024 | 0.016 |
| Total lipids in very large VLDL (mmol/L)                       | 4804 | 0.046 | 0.039 |
| Total lipids in large VLDL (mmol/L)                            | 4809 | 0.186 | 0.136 |
| Total lipids in medium VLDL (mmol/L)                           | 4811 | 0.499 | 0.248 |
| Total lipids in small VLDL (mmol/L)                            | 4807 | 0.666 | 0.216 |
| Total lipids in very small VLDL (mmol/L)                       | 4808 | 0.642 | 0.145 |
| Total lipids in IDL (mmol/L)                                   | 4815 | 1.320 | 0.277 |
| Total lipids in large LDL (mmol/L)                             | 4816 | 1.479 | 0.336 |
| Total lipids in medium LDL (mmol/L)                            | 4812 | 0.835 | 0.203 |
| Total lipids in small LDL (mmol/L)                             | 4815 | 0.528 | 0.123 |
| Total lipids in very large HDL (mmol/L)                        | 4809 | 0.459 | 0.196 |
| Total lipids in large HDL (mmol/L)                             | 4809 | 0.755 | 0.297 |
| Total lipids in medium HDL (mmol/L)                            | 4817 | 0.961 | 0.185 |
| Total lipids in small HDL (mmol/L)                             | 4808 | 1.165 | 0.136 |
| <b>Cholesterol</b>                                             |      |       |       |
| Serum total cholesterol (mmol/L)                               | 4812 | 5.07  | 0.92  |
| Total cholesterol in VLDL (mmol/L)                             | 4797 | 0.82  | 0.25  |
| Total cholesterol in IDL (mmol/L)                              | 4808 | 0.84  | 0.19  |
| Total cholesterol in LDL (mmol/L)                              | 4812 | 1.89  | 0.49  |
| Total cholesterol in HDL (mmol/L)                              | 4809 | 1.51  | 0.32  |
| Total cholesterol in HDL2 (mmol/L)                             | 4824 | 0.99  | 0.29  |
| Total cholesterol in HDL3 (mmol/L)                             | 4809 | 0.52  | 0.07  |
| Remnant cholesterol (non-HDL, non-LDL - cholesterol) (mmol/L)  | 4806 | 1.66  | 0.39  |
| Esterified cholesterol (mmol/L)                                | 4743 | 3.65  | 0.68  |
| Free cholesterol (mmol/L)                                      | 4743 | 1.41  | 0.26  |
| <b>Glycerides and other Phospholipids</b>                      |      |       |       |
| Serum total TG (mmol/L)                                        | 4806 | 1.24  | 0.47  |
| TG in VLDL (mmol/L)                                            | 4808 | 0.76  | 0.37  |
| TG in LDL (mmol/L)                                             | 4805 | 0.21  | 0.06  |
| TG in HDL (mmol/L)                                             | 4805 | 0.14  | 0.04  |
| Diacylglycerol (mmol/L)                                        | 4678 | 0.02  | 0.01  |
| Ratio of diacylglycerol to TG                                  | 4678 | 0.02  | 0.01  |
| Total phosphoglycerides (mmol/L)                               | 4742 | 2.02  | 0.38  |

|                                                                            |      |        |       |
|----------------------------------------------------------------------------|------|--------|-------|
| Ratio of TG to phosphoglycerides                                           | 4742 | 0.57   | 0.23  |
| Phosphatidylcholine and other cholines (mmol/L)                            | 4741 | 1.99   | 0.37  |
| Sphingomyelins (mmol/L)                                                    | 4743 | 0.49   | 0.09  |
| Total cholines (mmol/L)                                                    | 4737 | 2.39   | 0.40  |
| <b>Apolipoproteins (APO)</b>                                               |      |        |       |
| APO A-I (g/L)                                                              | 4824 | 1.60   | 0.19  |
| APO B (g/L)                                                                | 3687 | 101.96 | 25.18 |
| Ratio of APOB to APOA-I                                                    | 4824 | 0.61   | 0.13  |
| <b>Fatty Acids (FA)</b>                                                    |      |        |       |
| Total FA (mmol/L)                                                          | 4742 | 12.25  | 2.44  |
| Estimated description of fatty acid chain length, not actual carbon number | 4740 | 17.19  | 0.31  |
| Saturated FA (mmol/L)                                                      | 4737 | 4.65   | 0.96  |
| Monounsaturated FA; 16:1, 18:1 (mmol/L)                                    | 4737 | 2.97   | 0.87  |
| Polyunsaturated FA (mmol/L)                                                | 4742 | 4.63   | 0.81  |
| Omega-3 FA (mmol/L)                                                        | 4743 | 0.53   | 0.16  |
| 22:6, docosahexaenoic acid (mmol/L)                                        | 4743 | 0.19   | 0.07  |
| Omega-6 FA (mmol/L)                                                        | 4743 | 4.10   | 0.73  |
| 18:2, linoleic acid (mmol/L)                                               | 4743 | 3.33   | 0.65  |
| Conjugated linoleic acid (mmol/L)                                          | 4741 | 0.05   | 0.03  |
| <b>Fatty acids ratios relative to total fatty acids</b>                    |      |        |       |
| Estimated degree of unsaturation                                           | 4741 | 1.21   | 0.07  |
| Ratio of saturated FA to total FA (%)                                      | 4736 | 37.94  | 1.72  |
| Ratio of monounsaturated FA to total FA (%)                                | 4736 | 24.00  | 3.07  |
| Ratio of polyunsaturated FA to total FA (%)                                | 4741 | 38.07  | 3.36  |
| Ratio of omega-3 FA to total FA (%)                                        | 4742 | 4.34   | 1.10  |
| Ratio of 22:6 docosahexaenoic acid to total FA (%)                         | 4742 | 1.58   | 0.47  |
| Ratio of omega-6 FA to total FA (%)                                        | 4742 | 33.73  | 3.25  |
| Ratio of 18:2 linoleic acid to total FA (%)                                | 4742 | 27.44  | 3.48  |
| Ratio of conjugated linoleic acid to total FA (%)                          | 4740 | 0.39   | 0.17  |

Supplementary Table B: Comparison of characteristics assessed in 1997/99 between Whitehall II participants included in the analyses and those excluded.

| Characteristics of participants in 1997/99 |         | Participants included,<br>n=4824 |                     | Participants excluded,<br>n=3046 |                     | P-value† |
|--------------------------------------------|---------|----------------------------------|---------------------|----------------------------------|---------------------|----------|
|                                            |         | N                                | (%) or (mean ±SD)*  | N                                | (%) or (mean ±SD)*  |          |
| Sex                                        | Men     |                                  | 3483 (72.2)         |                                  | 1990 (65.6)         | <0.001   |
|                                            | Women   |                                  | 1341 (27.8)         |                                  | 1056 (34.4)         |          |
| Age, years                                 |         |                                  | 4824 (55.9 ±6.1 )*  |                                  | 3046 (56.0 ±6.0)*   | <0.001   |
| Ethnicity                                  | White   |                                  | 4541(93.9)          |                                  | 2645 (89.1)         | <0.001   |
| Smoking habits                             | Current |                                  | 470 (8.9)           |                                  | 500 (14.6)          | <0.001   |
| Physical activity, hours                   |         |                                  | 4824 (3.49 ±3.23)*  |                                  | 2290 (2.91 ± 3.02)* | <0.001   |
| Total Energy intake, kcal/day)             |         |                                  | 4824 (2233±683)*    |                                  | 593 (2114 ±771)*    | <0.001   |
| <b>CVD Risk factors</b>                    |         |                                  |                     |                                  |                     |          |
| Type 2 diabetes                            | Yes     |                                  | 296 (6.1)           |                                  | 205 (6.1)           | 0.22     |
| Systolic Blood pressure, mmHg              |         |                                  | 4824 (123.1 ±16.1)* |                                  | 1515 (123.4 ±16.6)* | 0.48     |
| Diastolic Blood pressure, mmHg             |         |                                  | 4824 (77.4±10.5)*   |                                  | 1715 (78.3±10.7)*   | 0.003    |
| Use of antihypertensive drugs              | Yes     |                                  | 607 (12.6)          |                                  | 491 (16.4)          | <0.001   |
| Total Cholesterol, mmol/L                  |         |                                  | 4824 (5.93 ±1.04)*  |                                  | 1644 (5.94 ± 1.10)* | 0.60     |
| Triglycerides, mmol/L                      |         |                                  | 4823 (1.35 ± 0.86)* |                                  | 1644 (1.46 ± 0.98)* | <0.001   |
| HDL-Cholesterol, mmol/L                    |         |                                  | 4298 (1.46 ±0.39)*  |                                  | 1448 (1.45 ±0.40)*  | 0.54     |
| Use of lipids lowering drugs               | Yes     |                                  | 155 (3.1)           |                                  | 116 (4.0)           | 0.05     |
| <b>AHEI score</b>                          |         |                                  |                     |                                  |                     |          |
| Low AHEI score (<51.5 points)              |         |                                  | 2385(49.4)          |                                  | 200 (47.5)          | 0.39     |
| High AHEI score (≥51.5 points)             |         |                                  | 2439 (50.6)         |                                  | 221 (52.5)          |          |

Supplementary Table C: Results of linear regression models estimating the association between AHEI z-score and each metabolite after adjustment for sex, age and total energy intake in Whitehall II study.

|                                                       | Beta   | Lower range of 95 % CI | Higher range of 95 % CI | p                   |
|-------------------------------------------------------|--------|------------------------|-------------------------|---------------------|
| <b>Amino Acids</b>                                    |        |                        |                         |                     |
| Alanine                                               | -0.023 | -0.053                 | 0.007                   | 0.13                |
| Glutamine                                             | 0.007  | -0.022                 | 0.035                   | 0.65                |
| Glycine                                               | 0.028  | -0.001                 | 0.057                   | 0.06                |
| Histidine                                             | 0.002  | -0.027                 | 0.031                   | 0.87                |
| Isoleucine                                            | -0.059 | -0.086                 | -0.031                  | 3*10 <sup>-5</sup>  |
| Leucine                                               | -0.074 | -0.101                 | -0.047                  | 1*10 <sup>-7</sup>  |
| Valine                                                | -0.022 | -0.049                 | 0.005                   | 0.12                |
| Phenylalanine                                         | -0.088 | -0.117                 | -0.059                  | 3*10 <sup>-9</sup>  |
| Tyrosine                                              | -0.031 | -0.060                 | -0.001                  | 0.04                |
| <b>Glycolysis related metabolites</b>                 |        |                        |                         |                     |
| Glucose                                               | -0.006 | -0.036                 | 0.023                   | 0.68                |
| Lactate                                               | -0.040 | -0.070                 | -0.011                  | 0.007               |
| Pyruvate                                              | -0.041 | -0.070                 | -0.011                  | 0.008               |
| Citrate                                               | -0.022 | -0.051                 | 0.007                   | 0.14                |
| Glycerol                                              | -0.052 | -0.081                 | -0.022                  | 0.001               |
| <b>Ketone bodies</b>                                  |        |                        |                         |                     |
| Acetate                                               | 0.005  | -0.021                 | 0.030                   | 0.72                |
| Acetoacetate                                          | 0.010  | -0.019                 | 0.039                   | 0.52                |
| 3-hydroxybutyrate                                     | -0.004 | -0.033                 | 0.026                   | 0.81                |
| <b>Fluid balance</b>                                  |        |                        |                         |                     |
| Creatinine                                            | -0.034 | -0.058                 | -0.010                  | 0.005               |
| Albumin (standardized concentration units)            | -0.017 | -0.045                 | 0.012                   | 0.26                |
| <b>Inflammation</b>                                   |        |                        |                         |                     |
| Glycoprotein acetyls, mainly a1-acid glycoprotein     | -0.070 | -0.099                 | -0.041                  | 3*10 <sup>-6</sup>  |
| VLDL particles                                        | -0.081 | -0.109                 | -0.053                  | 1*10 <sup>-8</sup>  |
| LDL particles                                         | 0.014  | -0.015                 | 0.044                   | 0.33                |
| HDL particles                                         | 0.047  | 0.021                  | 0.074                   | 0.0005              |
| Total lipids in chylomicrons and extremely large VLDL | -0.104 | -0.132                 | -0.075                  | 2*10 <sup>-12</sup> |
| Total lipids in very large VLDL                       | -0.094 | -0.123                 | -0.066                  | 1*10 <sup>-10</sup> |

|                                                      |        |        |        |              |
|------------------------------------------------------|--------|--------|--------|--------------|
| Total lipids in large VLDL                           | -0.085 | -0.113 | -0.056 | $6*10^{-9}$  |
| Total lipids in medium VLDL                          | -0.070 | -0.099 | -0.042 | $10^{-6}$    |
| Total lipids in small VLDL                           | -0.051 | -0.079 | -0.022 | 0.001        |
| Total lipids in very small VLDL                      | -0.046 | -0.075 | -0.017 | 0.002        |
| Total lipids in IDL                                  | -0.052 | -0.081 | -0.023 | 0.0004       |
| Total lipids in large LDL                            | -0.058 | -0.087 | -0.029 | $8*10^{-5}$  |
| Total lipids in medium LDL                           | -0.056 | -0.085 | -0.027 | 0.0002       |
| Total lipids in small LDL                            | -0.052 | -0.082 | -0.023 | 0.0004       |
| Total lipids in very large HDL                       | 0.005  | -0.022 | 0.032  | 0.72         |
| Total lipids in large HDL                            | 0.035  | 0.008  | 0.062  | 0.01         |
| Total lipids in medium HDL                           | -0.027 | -0.056 | 0.001  | 0.06         |
| Total lipids in small HDL                            | -0.080 | -0.109 | -0.050 | $1*10^{-7}$  |
| <b>Cholesterol concentrations</b>                    |        |        |        |              |
| Serum total cholesterol                              | -0.051 | -0.080 | -0.021 | 0.0007       |
| Total cholesterol in VLDL                            | -0.062 | -0.091 | -0.033 | $3*10^{-5}$  |
| Total cholesterol in IDL                             | -0.046 | -0.075 | -0.017 | 0.002        |
| Total cholesterol in LDL                             | -0.048 | -0.078 | -0.019 | 0.001        |
| Total cholesterol in HDL                             | 0.006  | -0.022 | 0.033  | 0.69         |
| Total cholesterol in HDL2                            | 0.016  | -0.012 | 0.043  | 0.26         |
| Total cholesterol in HDL3                            | -0.032 | -0.061 | -0.002 | 0.04         |
| Remnant cholesterol (non-HDL, non-LDL - cholesterol) | -0.061 | -0.090 | -0.032 | $4*10^{-5}$  |
| Esterified cholesterol                               | -0.041 | -0.070 | -0.012 | 0.006        |
| Free cholesterol                                     | -0.072 | -0.101 | -0.044 | $8*10^{-7}$  |
| <b>Triglyceride (TG) concentrations</b>              |        |        |        |              |
| Serum total TG                                       | -0.067 | -0.097 | -0.038 | $6*10^{-6}$  |
| TG in VLDL                                           | -0.063 | -0.092 | -0.034 | $2*10^{-5}$  |
| TG in LDL                                            | -0.054 | -0.083 | -0.025 | 0.0003       |
| TG in HDL                                            | -0.088 | -0.118 | -0.059 | $4*10^{-9}$  |
| Diacylglycerol                                       | -0.027 | -0.057 | 0.002  | 0.07         |
| Ratio of diacylglycerol to TG                        | -0.002 | -0.032 | 0.027  | 0.87         |
| Total phosphoglycerides                              | -0.035 | -0.064 | -0.006 | 0.02         |
| Ratio of TG to phosphoglycerides                     | -0.038 | -0.067 | -0.009 | 0.01         |
| Phosphatidylcholine and other cholines               | -0.032 | -0.061 | -0.004 | 0.03         |
| Sphingomyelins                                       | -0.098 | -0.126 | -0.070 | $5*10^{-12}$ |
| Total cholines                                       | -0.038 | -0.066 | -0.009 | 0.009        |
| <b>Apolipoproteins (APO)</b>                         |        |        |        |              |
| APO A-I                                              | 0.001  | -0.027 | 0.029  | 0.94         |
| APO B                                                | -0.031 | -0.060 | -0.002 | 0.04         |

|                                                         |                                                                            |        |        |        |                     |
|---------------------------------------------------------|----------------------------------------------------------------------------|--------|--------|--------|---------------------|
|                                                         | Ratio of APOB to APOA-I                                                    | -0.032 | -0.060 | -0.004 | 0.03                |
| <b>Fatty Acids (FA)</b>                                 |                                                                            |        |        |        |                     |
|                                                         | Total FA                                                                   | -0.048 | -0.077 | -0.018 | 0.001               |
|                                                         | Estimated description of fatty acid chain length, not actual carbon number | -0.003 | -0.033 | 0.026  | 0.82                |
|                                                         | Saturated FA                                                               | -0.081 | -0.111 | -0.052 | $6 \times 10^{-8}$  |
|                                                         | Monounsaturated FA; 16:1, 18:1                                             | -0.117 | -0.146 | -0.087 | $7 \times 10^{-15}$ |
|                                                         | Polyunsaturated FA                                                         | 0.074  | 0.045  | 0.103  | $6 \times 10^{-7}$  |
|                                                         | Omega-3 FA                                                                 | 0.136  | 0.107  | 0.165  | $2 \times 10^{-20}$ |
|                                                         | 22:6, docosahexaenoic acid                                                 | 0.175  | 0.147  | 0.203  | $7 \times 10^{-34}$ |
|                                                         | Omega-6 FA                                                                 | 0.051  | 0.022  | 0.081  | 0.0006              |
|                                                         | 18:2, linoleic acid                                                        | 0.074  | 0.045  | 0.103  | $9 \times 10^{-7}$  |
|                                                         | Conjugated linoleic acid                                                   | -0.230 | -0.259 | -0.201 | $5 \times 10^{-54}$ |
| <b>Fatty acids ratios relative to total fatty acids</b> |                                                                            |        |        |        |                     |
|                                                         | Estimated degree of unsaturation                                           | 0.258  | 0.230  | 0.287  | $7 \times 10^{-70}$ |
|                                                         | Ratio of saturated FA to total FA                                          | -0.158 | -0.187 | -0.129 | $3 \times 10^{-26}$ |
|                                                         | Ratio of monounsaturated FA to total FA                                    | -0.186 | -0.215 | -0.156 | $2 \times 10^{-35}$ |
|                                                         | Ratio of polyunsaturated FA to total FA                                    | 0.247  | 0.219  | 0.276  | $1 \times 10^{-62}$ |
|                                                         | Ratio of omega-3 FA to total FA                                            | 0.210  | 0.181  | 0.238  | $4 \times 10^{-46}$ |
|                                                         | Ratio of 22:6 docosahexaenoic acid to total FA                             | 0.240  | 0.212  | 0.268  | $4 \times 10^{-62}$ |
|                                                         | Ratio of omega-6 FA to total FA                                            | 0.185  | 0.156  | 0.214  | $2 \times 10^{-35}$ |
|                                                         | Ratio of 18:2 linoleic acid to total FA                                    | 0.181  | 0.152  | 0.210  | $6 \times 10^{-34}$ |
|                                                         | Ratio of conjugated linoleic acid to total FA                              | -0.254 | -0.282 | -0.225 | $1 \times 10^{-65}$ |

Supplementary Table D: Results of linear regression models estimating the association between AHEI 2010 z-score and each metabolite after adjustment for sex, age and total energy intake in Whitehall II study.

|                                                   | Beta   | Lower range of 95 % CI | Higher range of 95 % CI | p            |
|---------------------------------------------------|--------|------------------------|-------------------------|--------------|
| <b>Amino Acids</b>                                |        |                        |                         |              |
| Alanine                                           | -0.049 | -0.077                 | -0.020                  | 0.0008       |
| Glutamine                                         | 0.030  | 0.002                  | 0.058                   | 0.03         |
| Glycine                                           | 0.028  | 0.000                  | 0.056                   | 0.05         |
| Histidine                                         | -0.008 | -0.036                 | 0.019                   | 0.55         |
| Isoleucine                                        | -0.099 | -0.125                 | -0.072                  | $3*10^{-13}$ |
| Leucine                                           | -0.106 | -0.133                 | -0.080                  | $2*10^{-15}$ |
| Valine                                            | -0.043 | -0.069                 | -0.017                  | 0.013        |
| Phenylalanine                                     | -0.092 | -0.120                 | -0.064                  | $1*10^{-10}$ |
| Tyrosine                                          | -0.058 | -0.086                 | -0.030                  | $5*10^{-5}$  |
| <b>Glycolysis related metabolites</b>             |        |                        |                         |              |
| Glucose                                           | -0.019 | -0.047                 | 0.009                   | 0.18         |
| Lactate                                           | -0.053 | -0.082                 | -0.025                  | 0.0002       |
| Pyruvate                                          | -0.079 | -0.108                 | -0.050                  | $7*10^{-8}$  |
| Citrate                                           | -0.008 | -0.036                 | 0.020                   | 0.59         |
| Glycerol                                          | -0.101 | -0.129                 | -0.073                  | $1*10^{-12}$ |
| <b>Ketone bodies</b>                              |        |                        |                         |              |
| Acetate                                           | 0.006  | -0.018                 | 0.031                   | 0.61         |
| Acetoacetate                                      | 0.024  | -0.004                 | 0.052                   | 0.10         |
| 3-hydroxybutyrate                                 | 0.002  | -0.026                 | 0.030                   | 0.87         |
| <b>Fluid balance</b>                              |        |                        |                         |              |
| Creatinine                                        | -0.040 | -0.063                 | -0.017                  | 0.0006       |
| Albumin (standardized concentration units)        | -0.031 | -0.059                 | -0.003                  | 0.027        |
| <b>Inflammation</b>                               |        |                        |                         |              |
| Glycoprotein acetyls, mainly a1-acid glycoprotein | -0.119 | -0.147                 | -0.091                  | $1*10^{-16}$ |
|                                                   |        |                        |                         |              |
| VLDL particles                                    | -0.121 | -0.148                 | -0.094                  | $2*10^{-18}$ |
| LDL particles                                     | 0.043  | 0.015                  | 0.071                   | 0.002        |
| HDL particles                                     | 0.090  | 0.065                  | 0.116                   | $6*10^{-12}$ |
|                                                   |        |                        |                         |              |



|                                                       |        |        |        |               |
|-------------------------------------------------------|--------|--------|--------|---------------|
| Total lipids in chylomicrons and extremely large VLDL | -0.141 | -0.168 | -0.113 | $2*10^{-23}$  |
| Total lipids in very large VLDL                       | -0.135 | -0.163 | -0.108 | $8*10^{-22}$  |
| Total lipids in large VLDL                            | -0.130 | -0.157 | -0.102 | $2*10^{-20}$  |
| Total lipids in medium VLDL                           | -0.117 | -0.145 | -0.090 | $5*10^{-17}$  |
| Total lipids in small VLDL                            | -0.109 | -0.136 | -0.081 | $1*10^{-14}$  |
| Total lipids in very small VLDL                       | -0.090 | -0.118 | -0.062 | $3*10^{-10}$  |
| Total lipids in IDL                                   | -0.068 | -0.096 | -0.040 | $1.9*10^{-6}$ |
| Total lipids in large LDL                             | -0.080 | -0.108 | -0.052 | $2.4*10^{-8}$ |
| Total lipids in medium LDL                            | -0.077 | -0.105 | -0.049 | $6.7*10^{-8}$ |
| Total lipids in small LDL                             | -0.074 | -0.102 | -0.046 | $2.6*10^{-7}$ |
| Total lipids in very large HDL                        | 0.036  | 0.010  | 0.062  | 0.006         |
| Total lipids in large HDL                             | 0.062  | 0.036  | 0.088  | $3*10^{-6}$   |
| Total lipids in medium HDL                            | -0.061 | -0.088 | -0.033 | $1*10^{-5}$   |
| Total lipids in small HDL                             | -0.146 | -0.174 | -0.118 | $4*10^{-24}$  |
| <b>Cholesterol concentrations</b>                     |        |        |        |               |
| Serum total cholesterol                               | -0.068 | -0.096 | -0.040 | $1.8*10^{-6}$ |
| Total cholesterol in VLDL                             | -0.111 | -0.139 | -0.083 | $9*10^{-15}$  |
| Total cholesterol in IDL                              | -0.053 | -0.081 | -0.025 | 0.0002        |
| Total cholesterol in LDL                              | -0.065 | -0.093 | -0.037 | $6*10^{-6}$   |
| Total cholesterol in HDL                              | 0.016  | -0.010 | 0.043  | 0.2           |
| Total cholesterol in HDL2                             | 0.027  | 0.000  | 0.053  | 0.05          |
| Total cholesterol in HDL3                             | -0.026 | -0.054 | 0.003  | 0.07          |
| Remnant cholesterol (non-HDL, non-LDL - cholesterol)  | -0.094 | -0.122 | -0.066 | $5*10^{-11}$  |
| Esterified cholesterol                                | -0.066 | -0.094 | -0.038 | $5*10^{-6}$   |
| Free cholesterol                                      | -0.071 | -0.098 | -0.043 | $6*10^{-7}$   |
| <b>Triglyceride (TG) concentrations</b>               |        |        |        |               |
| Serum total TG                                        | -0.120 | -0.148 | -0.092 | $5*10^{-17}$  |
| TG in VLDL                                            | -0.116 | -0.144 | -0.088 | $3*10^{-16}$  |
| TG in LDL                                             | -0.091 | -0.119 | -0.063 | $2*10^{-10}$  |
| TG in HDL                                             | -0.125 | -0.153 | -0.096 | $6*10^{-18}$  |
| Diacylglycerol                                        | -0.071 | -0.099 | -0.042 | $10^{-6}$     |
| Ratio of diacylglycerol to TG                         | -0.017 | -0.045 | 0.011  | 0.24          |
| Total phosphoglycerides                               | -0.075 | -0.103 | -0.047 | $1*10^{-7}$   |
| Ratio of TG to phosphoglycerides                      | -0.089 | -0.117 | -0.061 | $4*10^{-10}$  |
| Phosphatidylcholine and other cholines                | -0.072 | -0.099 | -0.044 | $4*10^{-7}$   |
| Sphingomyelins                                        | -0.089 | -0.116 | -0.062 | $1*10^{-10}$  |
| Total cholines                                        | -0.068 | -0.095 | -0.040 | $1*10^{-6}$   |
| <b>Apolipoproteins (APO)</b>                          |        |        |        |               |

|                                                                            |        |        |        |                     |
|----------------------------------------------------------------------------|--------|--------|--------|---------------------|
| APO A-I                                                                    | 0.007  | -0.020 | 0.034  | 0.61                |
| APO B                                                                      | -0.046 | -0.074 | -0.018 | 0.001               |
| Ratio of APOB to APOA-I                                                    | -0.051 | -0.078 | -0.024 | 0.0002              |
| <b>Fatty Acids (FA)</b>                                                    |        |        |        |                     |
| Total FA                                                                   | -0.100 | -0.128 | -0.072 | $4 \times 10^{-12}$ |
| Estimated description of fatty acid chain length, not actual carbon number | -0.061 | -0.090 | -0.033 | $2 \times 10^{-5}$  |
| Saturated FA                                                               | -0.120 | -0.148 | -0.092 | $1 \times 10^{-16}$ |
| Monounsaturated FA; 16:1, 18:1                                             | -0.179 | -0.207 | -0.151 | $2 \times 10^{-35}$ |
| Polyunsaturated FA                                                         | 0.029  | 0.001  | 0.057  | 0.04                |
| Omega-3 FA                                                                 | 0.031  | 0.003  | 0.059  | 0.02                |
| 22:6, docosahexaenoic acid                                                 | 0.067  | 0.039  | 0.094  | $2 \times 10^{-6}$  |
| Omega-6 FA                                                                 | 0.024  | -0.004 | 0.053  | 0.09                |
| 18:2, linoleic acid                                                        | 0.065  | 0.037  | 0.093  | $6 \times 10^{-6}$  |
| Conjugated linoleic acid                                                   | -0.221 | -0.248 | -0.193 | $10^{-53}$          |
| <b>Fatty acids ratios relative to total fatty acids</b>                    |        |        |        |                     |
| Estimated degree of unsaturation                                           | 0.209  | 0.182  | 0.237  | $5 \times 10^{-49}$ |
| Ratio of saturated FA to total FA                                          | -0.103 | -0.131 | -0.075 | $7 \times 10^{-13}$ |
| Ratio of monounsaturated FA to total FA                                    | -0.242 | -0.269 | -0.214 | $2 \times 10^{-64}$ |
| Ratio of polyunsaturated FA to total FA                                    | 0.271  | 0.243  | 0.298  | $9 \times 10^{-81}$ |
| Ratio of omega-3 FA to total FA                                            | 0.122  | 0.094  | 0.150  | $2 \times 10^{-17}$ |
| Ratio of 22:6 docosahexaenoic acid to total FA                             | 0.149  | 0.121  | 0.176  | $4 \times 10^{-26}$ |
| Ratio of omega-6 FA to total FA                                            | 0.238  | 0.211  | 0.266  | $1 \times 10^{-62}$ |
| Ratio of 18:2 linoleic acid to total FA                                    | 0.246  | 0.218  | 0.273  | $3 \times 10^{-66}$ |
| Ratio of conjugated linoleic acid to total FA                              | -0.221 | -0.249 | -0.194 | $3 \times 10^{-54}$ |

Supplementary Table E: Associations between AHEI z-score and metabolites before and after adjustment for BMI\*

|                                                             | Before adjustment for BMI |                  | After adjustment for BMI |                  |
|-------------------------------------------------------------|---------------------------|------------------|--------------------------|------------------|
|                                                             | Beta*                     | 95% CI           | Beta*                    | 95% CI           |
| <b>Amino Acids</b>                                          |                           |                  |                          |                  |
| Isoleucine                                                  | -0.024                    | -0.052 to 0.004  | -0.025                   | -0.052 to 0.003  |
| Leucine                                                     | -0.043                    | -0.070 to -0.015 | -0.042                   | -0.070 to -0.015 |
| Phenylalanine                                               | -0.061                    | -0.091 to -0.030 | -0.061                   | -0.092 to -0.031 |
| <b>Glycolysis related metabolites</b>                       |                           |                  |                          |                  |
| Glycerol                                                    | -0.036                    | -0.067 to -0.005 | -0.035                   | -0.066 to -0.004 |
| <b>Inflammation</b>                                         |                           |                  |                          |                  |
| Glycoprotein acetyls                                        | -0.021                    | -0.051 to 0.008  | -0.023                   | -0.052 to 0.006  |
| <b>Size of lipoprotein particles (Mean diameters)</b>       |                           |                  |                          |                  |
| VLDL particle size                                          | -0.028                    | -0.057 to 0.001  | -0.030                   | -0.059 to -0.001 |
| HDL particle size                                           | 0.018                     | -0.010 to 0.047  | 0.020                    | -0.009 to 0.048  |
| <b>Total lipid concentrations in lipoprotein subclasses</b> |                           |                  |                          |                  |
| Total lipids in chylomicrons and extremely large VLDL       | -0.055                    | -0.085 to -0.025 | -0.056                   | -0.086 to -0.026 |
| Total lipids in very large VLDL                             | -0.043                    | -0.073 to -0.013 | -0.044                   | -0.074 to -0.014 |
| Total lipids in large VLDL                                  | -0.029                    | -0.059 to 0.001  | -0.030                   | -0.060 to -0.001 |
| Total lipids in medium VLDL                                 | -0.017                    | -0.046 to 0.013  | -0.018                   | -0.048 to 0.012  |
| Total lipids in small VLDL                                  | 0.001                     | -0.030 to 0.030  | -0.001                   | -0.031 to 0.029  |
| Total lipids in IDL                                         | -0.031                    | -0.063 to 0.001  | -0.031                   | -0.063 to 0.001  |
| Total lipids in large LDL                                   | -0.035                    | -0.068 to -0.003 | -0.036                   | -0.068 to -0.003 |
| Total lipids in medium LDL                                  | -0.033                    | -0.066 to -0.001 | -0.034                   | -0.066 to -0.001 |
| Total lipids in small LDL                                   | -0.028                    | -0.061 to 0.004  | -0.029                   | -0.061 to 0.004  |
| Total lipids in small HDL                                   | -0.046                    | -0.077 to -0.014 | -0.045                   | -0.077 to -0.014 |
| <b>Cholesterol</b>                                          |                           |                  |                          |                  |
| Cholesterol in VLDL                                         | -0.019                    | -0.050 to 0.012  | -0.020                   | -0.050 to 0.011  |
| Remnant cholesterol (non-HDL, non-LDL - cholesterol)        | -0.028                    | -0.059 to 0.004  | -0.028                   | -0.060 to 0.004  |
| Free cholesterol                                            | -0.051                    | -0.083 to -0.019 | -0.051                   | -0.083 to -0.019 |
| <b>Glycerides and other Phospholipids</b>                   |                           |                  |                          |                  |
| Serum total TG                                              | -0.015                    | -0.045 to 0.015  | -0.015                   | -0.045 to 0.015  |
| TG in VLDL                                                  | -0.010                    | -0.040 to 0.019  | -0.012                   | -0.041 to 0.018  |
| TG in LDL                                                   | -0.017                    | -0.048 to 0.014  | -0.017                   | -0.048 to 0.014  |
| TG in HDL                                                   | -0.048                    | -0.079 to -0.017 | -0.048                   | -0.079 to -0.017 |
| Sphingomyelins                                              | -0.078                    | -0.109 to -0.047 | -0.078                   | -0.109 to -0.047 |
| <b>Fatty Acids (FA)</b>                                     |                           |                  |                          |                  |
| Saturated FA                                                | -0.044                    | -0.075 to -0.013 | -0.044                   | -0.075 to -0.013 |
| Monounsaturated FA                                          | -0.054                    | -0.084 to -0.023 | -0.054                   | -0.084 to -0.023 |
| Polyunsaturated FA                                          | 0.083                     | 0.051 to 0.115   | 0.082                    | 0.050 to 0.114   |

|                                                          |        |                  |        |                  |
|----------------------------------------------------------|--------|------------------|--------|------------------|
| Omega-3 FA                                               | 0.144  | 0.112 to 0.176   | 0.144  | 0.113 to 0.176   |
| docosahexaenoic acid                                     | 0.179  | 0.148 to 0.210   | 0.179  | 0.148 to 0.210   |
| Omega-6 FA                                               | 0.060  | 0.028 to 0.092   | 0.059  | 0.027 to 0.092   |
| linoleic acid                                            | 0.080  | 0.048 to 0.112   | 0.079  | 0.047 to 0.111   |
| Conjugated linoleic acid                                 | -0.182 | -0.213 to -0.152 | -0.182 | -0.213 to -0.152 |
| <b>Fatty acids ratios, relative to total fatty acids</b> |        |                  |        |                  |
| Estimated degree of unsaturation                         | 0.200  | 0.170 to 0.229   | 0.200  | 0.171 to 0.230   |
| Ratio of saturated FA to total FA                        | -0.162 | -0.194 to -0.130 | -0.161 | -0.194 to -0.129 |
| Ratio of monounsaturated FA to total FA                  | -0.109 | -0.139 to -0.080 | -0.109 | -0.139 to -0.080 |
| Ratio of polyunsaturated FA to total FA                  | 0.180  | 0.150 to 0.209   | 0.179  | 0.150 to 0.208   |
| Ratio of omega-3 FA to total FA                          | 0.185  | 0.154 to 0.216   | 0.186  | 0.155 to 0.217   |
| Ratio of docosahexaenoic acid to total FA                | 0.215  | 0.185 to 0.246   | 0.216  | 0.186 to 0.246   |
| Ratio of omega-6 FA to total FA                          | 0.124  | 0.094 to 0.154   | 0.124  | 0.094 to 0.154   |
| Ratio of linoleic acid to total FA                       | 0.132  | 0.102 to 0.163   | 0.132  | 0.102 to 0.162   |
| Ratio of conjugated linoleic acid to total FA            | -0.211 | -0.242 to -0.180 | -0.211 | -0.242 to -0.180 |

Models adjusted for age, sex, total energy intake, ethnicity, smoking habits, physical activity, type 2 diabetes, diastolic and systolic blood pressure, use of antihypertensive drugs and use of lipid-lowering drugs. Results were expressed as linear regression coefficients accompanied with their 95 % confidence interval

\* Analyses were carried out on 4175 participants with available data on BMI

Supplementary Table F: Sensitivity analyses of associations between AHEI z-score\* and metabolites.

|                                                             | In Participants without antecedent of CVD |                  | In Participants without prevalent cancer |                  |
|-------------------------------------------------------------|-------------------------------------------|------------------|------------------------------------------|------------------|
|                                                             | Beta                                      | N=3920<br>95% CI | Beta                                     | N=4052<br>95% CI |
| <b>Amino Acids</b>                                          |                                           |                  |                                          |                  |
| Isoleucine                                                  | -0.048                                    | -0.076 to -0.020 | -0.043                                   | -0.071 to -0.015 |
| Leucine                                                     | -0.064                                    | -0.092 to -0.036 | -0.057                                   | -0.084 to -0.029 |
| Phenylalanine                                               | -0.078                                    | -0.109 to -0.048 | -0.068                                   | -0.098 to -0.038 |
| <b>Glycolysis related metabolites</b>                       |                                           |                  |                                          |                  |
| Glycerol                                                    | -0.043                                    | -0.074 to -0.012 | -0.039                                   | -0.069 to -0.009 |
| <b>Inflammation</b>                                         |                                           |                  |                                          |                  |
| Glycoprotein acetyls                                        | -0.039                                    | -0.068 to -0.009 | -0.036                                   | -0.065 to -0.007 |
| <b>Size of lipoprotein particles (Mean diameters)</b>       |                                           |                  |                                          |                  |
| VLDL particle size                                          | -0.051                                    | -0.079 to -0.022 | -0.053                                   | -0.081 to -0.024 |
| HDL particle size                                           | 0.037                                     | 0.009 to 0.066   | 0.034                                    | 0.006 to 0.062   |
| <b>Total lipid concentrations in lipoprotein subclasses</b> |                                           |                  |                                          |                  |
| Total lipids in chylomicrons and extremely large VLDL       | -0.076                                    | -0.105 to -0.046 | -0.077                                   | -0.106 to -0.047 |
| Total lipids in very large VLDL                             | -0.063                                    | -0.093 to -0.034 | -0.065                                   | -0.094 to -0.035 |
| Total lipids in large VLDL                                  | -0.052                                    | -0.081 to -0.022 | -0.054                                   | -0.083 to -0.025 |
| Total lipids in medium VLDL                                 | -0.039                                    | -0.069 to -0.010 | -0.041                                   | -0.070 to -0.012 |
| Total lipids in IDL                                         | -0.039                                    | -0.070 to -0.009 | -0.040                                   | -0.070 to -0.009 |
| Total lipids in large LDL                                   | -0.045                                    | -0.075 to -0.014 | -0.045                                   | -0.075 to -0.014 |
| Total lipids in medium LDL                                  | -0.043                                    | -0.074 to -0.013 | -0.044                                   | -0.074 to -0.013 |
| Total lipids in small LDL                                   | -0.038                                    | -0.069 to -0.007 | -0.039                                   | -0.070 to -0.008 |
| Total lipids in small HDL                                   | -0.054                                    | -0.084 to -0.024 | -0.048                                   | -0.078 to -0.019 |
| <b>Cholesterol</b>                                          |                                           |                  |                                          |                  |
| Cholesterol in VLDL                                         | -0.039                                    | -0.069 to -0.009 | -0.038                                   | -0.068 to -0.008 |
| Remnant cholesterol (non-HDL, non-LDL - cholesterol)        | -0.043                                    | -0.073 to -0.012 | -0.042                                   | -0.073 to -0.012 |
| Free cholesterol                                            | -0.053                                    | -0.083 to -0.023 | -0.057                                   | -0.087 to -0.027 |
| <b>Glycerides and other Phospholipids</b>                   |                                           |                  |                                          |                  |
| Serum total TG                                              | -0.036                                    | -0.066 to -0.006 | -0.038                                   | -0.068 to -0.009 |
| TG in VLDL                                                  | -0.033                                    | -0.062 to -0.004 | -0.035                                   | -0.064 to -0.006 |
| TG in LDL                                                   | -0.029                                    | -0.059 to 0.001  | -0.032                                   | -0.061 to -0.002 |
| TG in HDL                                                   | -0.061                                    | -0.091 to -0.032 | -0.062                                   | -0.092 to -0.032 |
| Sphingomyelins                                              | -0.081                                    | -0.111 to -0.052 | -0.081                                   | -0.110 to -0.052 |
| <b>Fatty Acids (FA)</b>                                     |                                           |                  |                                          |                  |
| Saturated FA                                                | -0.056                                    | -0.086 to -0.026 | -0.057                                   | -0.087 to -0.027 |
| Monounsaturated FA                                          | -0.069                                    | -0.099 to -0.040 | -0.070                                   | -0.099 to -0.040 |
| Polyunsaturated FA                                          | 0.075                                     | 0.045 to 0.105   | 0.077                                    | 0.046 to 0.107   |

|                                                          |        |                  |        |                  |
|----------------------------------------------------------|--------|------------------|--------|------------------|
| Omega-3 FA                                               | 0.136  | 0.106 to 0.166   | 0.144  | 0.114 to 0.174   |
| docosahexaenoic acid                                     | 0.174  | 0.144 to 0.203   | 0.182  | 0.152 to 0.211   |
| Omega-6 FA                                               | 0.053  | 0.023 to 0.083   | 0.053  | 0.023 to 0.083   |
| linoleic acid                                            | 0.076  | 0.045 to 0.106   | 0.075  | 0.044 to 0.105   |
| Conjugated linoleic acid                                 | -0.198 | -0.228 to -0.168 | -0.198 | -0.228 to -0.169 |
| Estimated degree of unsaturation                         | 0.208  | 0.179 to 0.236   | 0.214  | 0.186 to 0.242   |
| <b>Fatty acids ratios, relative to total fatty acids</b> |        |                  |        |                  |
| Ratio of saturated FA to total FA (%)                    | -0.162 | -0.192 to -0.132 | -0.165 | -0.195 to -0.135 |
| Ratio of monounsaturated FA to total FA (%)              | -0.124 | -0.153 to -0.095 | -0.125 | -0.154 to -0.096 |
| Ratio of polyunsaturated FA to total FA (%)              | 0.193  | 0.164 to 0.221   | 0.195  | 0.167 to 0.224   |
| Ratio of omega-3 FA to total FA (%)                      | 0.186  | 0.157 to 0.216   | 0.196  | 0.167 to 0.225   |
| Ratio of docosahexaenoic acid to total FA (%)            | 0.219  | 0.190 to 0.247   | 0.214  | 0.186 to 0.242   |
| Ratio of omega-6 FA to total FA (%)                      | 0.137  | 0.108 to 0.166   | 0.137  | 0.107 to 0.166   |
| Ratio of linoleic acid to total FA (%)                   | 0.146  | 0.116 to 0.175   | 0.144  | 0.115 to 0.174   |
| Ratio of conjugated linoleic acid to total FA (%)        | -0.226 | -0.256 to -0.196 | -0.226 | -0.256 to -0.197 |

Models adjusted for age, sex, total energy intake, ethnicity, smoking habits, physical activity, type 2 diabetes, diastolic and systolic blood pressure, use of antihypertensive drugs and use of lipid-lowering drugs. Results were expressed as linear regression coefficients accompanied with their 95 % confidence interval

Supplementary Table G: Metabolite concentrations in YFS participants – Replication analyses

|                                                                | <b>N</b> | <b>Mean</b> | <b>sd</b> |
|----------------------------------------------------------------|----------|-------------|-----------|
| <b>Amino Acids</b>                                             |          |             |           |
| Isoleucine (mmol/L)                                            | 1678     | 0.24        | 0.03      |
| Leucine (mmol/L)                                               | 1678     | 0.30        | 0.03      |
| Phenylalanine (mmol/L)                                         | 1678     | 0.30        | 0.02      |
| <b>Glycolysis related metabolites</b>                          |          |             |           |
| Glycerol(mmol/L)                                               | 1625     | 0.32        | 0.05      |
| <b>Inflammation</b>                                            |          |             |           |
| Glycoprotein acetyls(mmol/L)                                   | 1678     | 1.29        | 0.11      |
| <b>Size of lipoprotein particles (Mean diameters)</b>          |          |             |           |
| VLDL particle size (nm)                                        | 1679     | 6.01        | 0.11      |
| HDL particle size( nm)                                         | 1679     | 3.16        | 0.04      |
| <b>Total lipid concentrations in lipoprotein subclasses</b>    |          |             |           |
| Total lipids in chylomicrons and extremely large VLDL (mmol/L) | 1679     | 0.14        | 0.08      |
| Total lipids in very large VLDL (mmol/L)                       | 1679     | 0.20        | 0.14      |
| Total lipids in large VLDL (mmol/L)                            | 1679     | 0.43        | 0.24      |
| Total lipids in medium VLDL (mmol/L)                           | 1679     | 0.72        | 0.22      |
| Total lipids in IDL (mmol/L)                                   | 1679     | 1.15        | 0.14      |
| Total lipids in large LDL (mmol/L)                             | 1679     | 1.23        | 0.16      |
| Total lipids in medium LDL (mmol/L)                            | 1679     | 0.92        | 0.13      |
| Total lipids in small LDL (mmol/L)                             | 1679     | 0.73        | 0.10      |
| Total lipids in small HDL (mmol/L)                             | 1679     | 1.10        | 0.08      |
| <b>Cholesterol</b>                                             |          |             |           |
| Cholesterol in VLDL(mmol/L)                                    | 1679     | 0.88        | 0.16      |
| Remnant cholesterol (non-HDL, non-LDL - cholesterol) (mmol/L)  | 1679     | 1.27        | 0.18      |
| Free cholesterol(mmol/L)                                       | 1677     | 1.27        | 0.12      |
| <b>Glycerides and other Phospholipids</b>                      |          |             |           |
| Serum total TG (mmol/L)                                        | 1679     | 1.10        | 0.28      |
| TG in VLDL (mmol/L)                                            | 1679     | 0.86        | 0.28      |
| TG in LDL (mmol/L)                                             | 1679     | 0.43        | 0.08      |
| TG in HDL (mmol/L)                                             | 1679     | 0.39        | 0.06      |
| Sphingomyelins (mmol/L)                                        | 1677     | 0.74        | 0.07      |
| <b>Fatty Acids (FA)</b>                                        |          |             |           |
| Saturated FA (mmol/L)                                          | 1677     | 2.25        | 0.26      |
| Monounsaturated FA (mmol/L)                                    | 1677     | 1.91        | 0.28      |
| Polyunsaturated FA (mmol/L)                                    | 1677     | 2.18        | 0.21      |
| Omega-3 FA (mmol/L)                                            | 1677     | 0.76        | 0.12      |
| docosahexaenoic acid (mmol/L)                                  | 1677     | 0.49        | 0.07      |
| Omega-6 FA (mmol/L)                                            | 1677     | 2.04        | 0.19      |
| linoleic acid (mmol/L)                                         | 1677     | 1.84        | 0.17      |
| <b>Fatty acids ratios, relative to total fatty acids</b>       |          |             |           |

---

|                                               |      |      |      |
|-----------------------------------------------|------|------|------|
| Estimated degree of unsaturation              | 1677 | 1.07 | 0.03 |
| Ratio of saturated FA to total FA (%)         | 1677 | 6.12 | 0.16 |
| Ratio of monounsaturated FA to total FA (%)   | 1677 | 5.19 | 0.27 |
| Ratio of polyunsaturated FA to total FA (%)   | 1677 | 5.95 | 0.28 |
| Ratio of omega-3 FA to total FA (%)           | 1677 | 2.07 | 0.24 |
| Ratio of docosahexaenoic acid to total FA (%) | 1677 | 1.33 | 0.15 |
| Ratio of omega-6 FA to total FA (%)           | 1677 | 5.58 | 0.27 |
| Ratio of linoleic acid to total FA (%)        | 1677 | 5.01 | 0.29 |

---



Supplementary Table H: Estimates of the multivariable-adjusted associations between AHEI z-score and metabolites from meta-analysis of the Whitehall II study and in Young Finns Study

|                                                             | <b>Beta</b> | <b>95% CI</b>    | <b>p</b> |
|-------------------------------------------------------------|-------------|------------------|----------|
| <b>Amino Acids</b>                                          |             |                  |          |
| Isoleucine                                                  | -0.030      | -0.053 to -0.007 | 0.012    |
| Leucine                                                     | -0.042      | -0.065 to -0.019 | <0.0001  |
| Phenylalanine                                               | -0.066      | -0.092 to -0.040 | <0.0001  |
| <b>Glycolysis related metabolites</b>                       |             |                  |          |
| Glycerol                                                    | -0.035      | -0.061 to -0.010 | 0.007    |
| <b>Inflammation</b>                                         |             |                  |          |
| Glycoprotein acetyls                                        | -0.031      | -0.056 to -0.006 | 0.02     |
| <b>Size of lipoprotein particles (Mean diameters)</b>       |             |                  |          |
| VLDL particle size                                          | -0.037      | -0.062 to -0.013 | 0.003    |
| HDL particle size                                           | 0.024       | 0.001 to 0.048   | 0.044    |
| <b>Total lipid concentrations in lipoprotein subclasses</b> |             |                  |          |
| Total lipids in chylomicrons and extremely large VLDL       | -0.064      | -0.089 to -0.039 | <0.0001  |
| Total lipids in very large VLDL                             | -0.051      | -0.076 to -0.027 | <0.0001  |
| Total lipids in large VLDL                                  | -0.039      | -0.064 to -0.014 | 0.002    |
| Total lipids in medium VLDL                                 | -0.028      | -0.052 to -0.003 | 0.03     |
| Total lipids in small VLDL                                  | -0.010      | -0.035 to 0.015  | 0.428    |
| Total lipids in IDL                                         | -0.038      | -0.064 to -0.012 | 0.004    |
| Total lipids in large LDL                                   | -0.042      | -0.068 to -0.016 | 0.002    |
| Total lipids in medium LDL                                  | -0.040      | -0.066 to -0.014 | 0.003    |
| Total lipids in small LDL                                   | -0.037      | -0.063 to -0.011 | 0.006    |
| Total lipids in small HDL                                   | -0.041      | -0.067 to -0.015 | 0.002    |
| <b>Cholesterol</b>                                          |             |                  |          |
| Cholesterol in VLDL                                         | -0.029      | -0.054 to -0.003 | 0.027    |
| Remnant cholesterol (non-HDL, non-LDL - cholesterol)        | -0.037      | -0.062 to -0.011 | 0.005    |
| Free cholesterol                                            | -0.051      | -0.076 to -0.025 | <0.0001  |
| <b>Glycerides and other Phospholipids</b>                   |             |                  |          |
| Serum total TG                                              | -0.027      | 0.051 to -0.002  | 0.04     |
| TG in VLDL                                                  | -0.023      | -0.048 to 0.002  | 0.07     |
| TG in LDL                                                   | -0.026      | -0.052 to -0.001 | 0.04     |
| TG in HDL                                                   | -0.050      | -0.076 to -0.025 | <0.0001  |

|                                                          |        |                  |         |
|----------------------------------------------------------|--------|------------------|---------|
| Sphingomyelins                                           | -0.068 | -0.093 to -0.043 | <0.0001 |
| <b>Fatty Acids (FA)</b>                                  |        |                  |         |
| Saturated FA                                             | -0.050 | -0.075 to -0.025 | <0.0001 |
| Monounsaturated FA                                       | -0.058 | -0.083 to -0.033 | <0.0001 |
| Polyunsaturated FA                                       | 0.064  | 0.039 to 0.090   | <0.0001 |
| Omega-3 FA                                               | 0.130  | 0.104 to 0.155   | <0.0001 |
| docosahexaenoic acid                                     | 0.158  | 0.133 to 0.183   | <0.0001 |
| Omega-6 FA                                               | 0.043  | 0.017 to 0.068   | 0.001   |
| linoleic acid                                            | 0.058  | 0.032 to 0.084   | <0.0001 |
| Conjugated linoleic acid                                 | 0.189  | 0.164 to 0.213   | <0.0001 |
| <b>Fatty acids ratios, relative to total fatty acids</b> |        |                  |         |
| Estimated degree of unsaturation                         | 0.189  | 0.164 0.213      | <0.0001 |
| Ratio of saturated FA to total FA (%)                    | -0.146 | -0.172 -0.120    | <0.0001 |
| Ratio of monounsaturated FA to total FA (%)              | -0.101 | -0.125 -0.076    | <0.0001 |
| Ratio of polyunsaturated FA to total FA (%)              | 0.167  | 0.142 0.191      | <0.0001 |
| Ratio of omega-3 FA to total FA (%)                      | 0.179  | 0.154 0.204      | <0.0001 |
| Ratio of docosahexaenoic acid to total FA (%)            | 0.201  | 0.177 0.226      | <0.0001 |
| Ratio of omega-6 FA to total FA (%)                      | 0.114  | 0.089 0.139      | <0.0001 |
| Ratio of linoleic acid to total FA (%)                   | 0.117  | 0.091 0.142      | <0.0001 |

Supplementary Table I: Construction of AHEI scores

| Components                   | Criteria for min. scores | Criteria for max. scores | Possible score range | Scores in the WII participants (n=4824) |        | Scores in the YFS participants (n=1716) |        |
|------------------------------|--------------------------|--------------------------|----------------------|-----------------------------------------|--------|-----------------------------------------|--------|
|                              |                          |                          |                      | Mean score (SD)                         | Median | Mean score (SD)                         | Median |
| Vegetable (serving /day)     | 0                        | 5                        | 0-10                 | 6.5 (2.4)                               | 6      | 7.3 (2.5)                               | 8      |
| Fruit (serving /day)         | 0                        | 4                        | 0-10                 | 6.7 (2.8)                               | 7      | 4.1 (2.6)                               | 4      |
| Nuts and Soy (serving /day)  | 0                        | 1                        | 0-10                 | 1.9 (2.5)                               | 1      | 1.7 (1.6)                               | 1      |
| Ratio of white to red meat   | 0                        | 4                        | 0-10                 | 3.3 (2.7)                               | 2      | 2.1 (1.7)                               | 2      |
| Trans Fat (% of energy )     | ≥4                       | ≤0.5                     | 0-10                 | 9.6 (0.7)                               | 10     | 9.9 (0.3)                               | 10     |
| Total Fiber (gram/day)       | 0                        | 24                       | 0-10                 | 8.9 (1.7)                               | 10     | 8.3 (2.0)                               | 9      |
| Ratio of PUFA to SFA         | ≤0.1                     | ≥1                       | 0-10                 | 4.9 (2.2)                               | 5      | 4.2 (1.2)                               | 4      |
| Duration of multivitamin Use | <5 year                  | ≥5 year                  | 2.5-7.5              | 3.8 (2.2)                               | 2.5    | 4.7 (2.5)                               | 2.5    |
| Alcohol serving/day          | Men                      | >3.5                     | 1.5-2.5              | 5.5 (4.0) †                             | 4†     | 4.0 (3.9)                               | 4      |
| Alcohol serving/day          | Women                    | >2.5                     | 0.5-1.5              |                                         |        |                                         |        |
| Total Score                  |                          |                          | 2.5-87.5             | 50.7 (9.8)                              | 50.5   | 46.3 (8.0)                              | 46.5   |

Abbreviation: AHEI, the alternative healthy eating index; WII, Whitehall II ; YFS, the Cardiovascular Risk in Young Finns Study ; PUFA, Polyunsaturated fatty acids; SAF, saturated fatty acids.

\*Each AHEI component contributed from 0 to 10 points to the total AHEI score, except the multivitamin component which was dichotomous and contributing either 2.5 points (for non-use) or 7.5 points (for use) A score of 10 indicates that the recommendations were fully met, whereas a score of 0 represents the least healthy dietary behavior. Intermediate intakes were scored proportionately between 0 and 10.

† Median score for men and women combined. Nondrinkers received a score of 2.5

Supplementary Table J : Construction of AHEI 2010 scores

| Components                          | Criteria for min. scores | Criteria for max. scores | Scores in the WII participants (n=4824) |        |
|-------------------------------------|--------------------------|--------------------------|-----------------------------------------|--------|
|                                     |                          |                          | Mean (sd)                               | Median |
| Vegetable (serving /day)            | 0                        | ≥5                       | 6.5 (2.4)                               | 6      |
| Fruit (serving /day)                | 0                        | ≥4                       | 5.8 (2.8)                               | 6      |
| Whole grains (serving /day)         | Men                      | 5                        | 3.3 (2.6)                               | 2      |
|                                     | Women                    | 6                        |                                         |        |
| Soda and fruit juice (serving /day) | ≥1                       | 0                        | 3.4 (3.6)                               | 2      |
| Nuts and legumes (serving /day)     | 0                        | 1                        | 2.5 (2.8)                               | 2      |
| Processed /Red Meat                 | ≥1.5                     | 0                        | 5.1 (2.8)                               | 5      |
| Trans Fat (% of energy )            | ≥4                       | ≤0.5                     | 5.0 (3.1)                               | 5      |
| Long-chain (n-3) fats, mg/d         | 0                        | 250                      | 8.1 (2.6)                               | 10     |
| PUFA*, % of energy                  | ≤2                       | ≥10                      | 3.7 (2.8)                               | 3      |
| Sodium, mg/d                        | Highest decile           | Lowest decile            | 5.0 (3.2)                               | 5      |
| Alcohol serving/day                 | Men                      | ≤ 1.5                    | 5.5 (4.0)                               | 3      |
|                                     | Women                    | ≤ 0.5                    |                                         |        |
| Total Score                         |                          |                          | 53.8 (10.0)                             |        |

\* PUFA (Polyunsaturated fatty acids) does not include n-3 PUFA.

Each AHEI component contributed from 0 to 10 points to the total AHEI-2010 score. A score of 10 indicates that the recommendations were fully met, whereas a score of 0 represents the least healthy dietary behavior. Intermediate intakes were scored proportionately between 0 and 10. All the component scores are summed to obtain the total AHEI-2010 score
